# Supplementary material
Source: Springer Nature journal article supplement (https://www.springermedizin.de/resource/supplementary/12943_2010_780_MOESM6_ESM.pdf/9554802)

**A**

-282 GGCTGCGGATCCGTGCTTCAACCACCTGCTTTGCGCTGCGTCCGGGGAAAGTGGGGAGGAGACCGGGAGGGGA  
 -212 GGGAGGAGGGCGGGGAGAGGAGGAAAGAGGCAGCTTACACACCGCCTTCCAGTCCCTCTACTCAGAGCAGCC  
 -142 CGGAGACCGCTGCCGCGCTGCCGCTGCTACCACCGCTGCCACCTGAGGAGACCCGCCGCCCCCGTGC

M = methylated  
 U = unmethylated

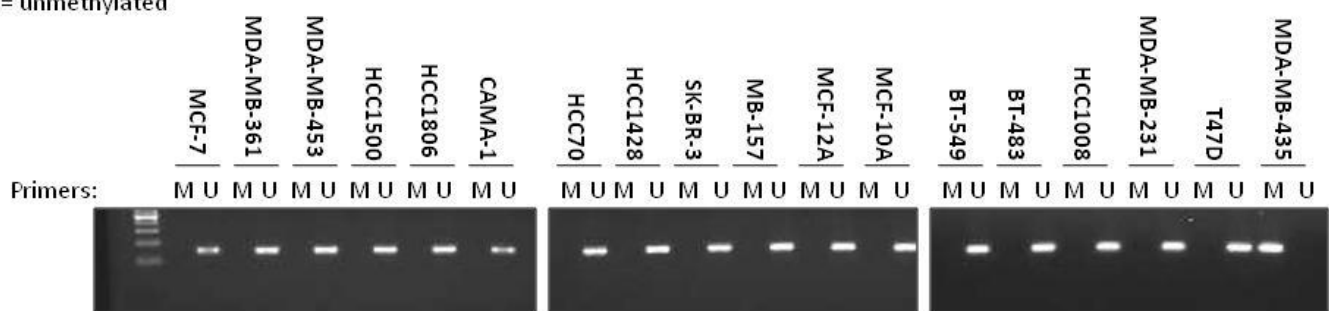**B**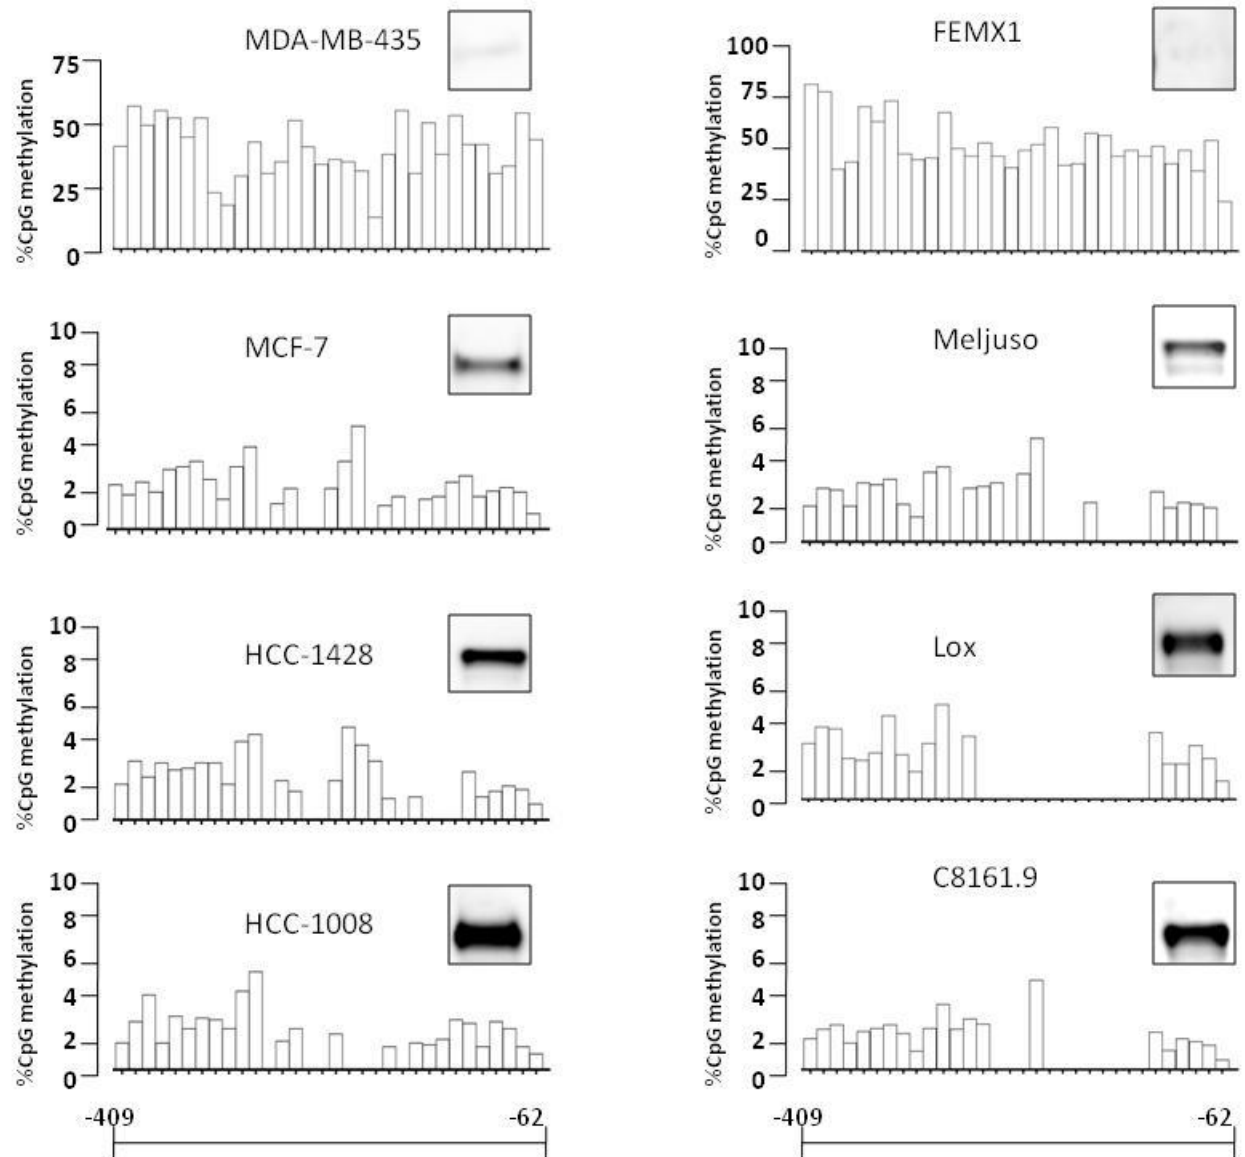

Supplement: MOESM6 [file 9554802]
